# Supplementary material for: The Tridirectional Relationship among Physical Activity, Stress, and Academic Performance in University Students: A Systematic Review and Meta-Analysis
Source: Int J Environ Res Public Health. 2021 Jan 16;18(2):739. doi: 10.3390/ijerph18020739 (PMC7830011; doi:10.3390/ijerph18020739)
Supplement: Supplementary file 1 [file ijerph-18-00739-s001.pdf]

## Supplement 1.

Supplementary Table 1. Individual search terms for databases.

| Database | Searchterm                                                                                                                                                                                                                                                                                                                                                                                                                                                                                                                                                                                                                                                                                                                                                                                                                                                                                                                                                                                                                                                              | Matches | Added to project (without doublettes) |
|----------|-------------------------------------------------------------------------------------------------------------------------------------------------------------------------------------------------------------------------------------------------------------------------------------------------------------------------------------------------------------------------------------------------------------------------------------------------------------------------------------------------------------------------------------------------------------------------------------------------------------------------------------------------------------------------------------------------------------------------------------------------------------------------------------------------------------------------------------------------------------------------------------------------------------------------------------------------------------------------------------------------------------------------------------------------------------------------|---------|---------------------------------------|
| Pubmed   | (((((("physical activity"[Title/Abstract] OR "habitual activity"[Title/Abstract] OR "exercise"[Title/Abstract] OR "exercises"[Title/Abstract] OR fitness[Title/Abstract] OR sport[Title/Abstract] OR sedentary[Title/Abstract] OR training[Title/Abstract] OR "physical education"[Title/Abstract] OR "physical activities"[Title/Abstract] OR "habitual activities"[Title/Abstract] OR sports[Title/Abstract] OR sedentariness[Title/Abstract])) AND (stress[Title] OR exam[Title] OR exams[Title] OR test[Title] OR tests[Title] OR "academic performance"[Title])) AND (achievement[Title/Abstract] OR grade[Title/Abstract] OR grades[Title/Abstract] OR performance[Title/Abstract] OR outcome[Title/Abstract] OR attainment[Title/Abstract] OR assessment[Title/Abstract] OR score[Title/Abstract])) AND (student[Title] OR college[Title] OR graduate[Title] OR university[Title] OR tertiary[Title] OR students[Title] OR colleges[Title] OR graduates[Title] OR universities[Title] OR academic[Title])) NOT (school[Title] OR pupil[Title] OR pupils[Title])) | 399     | 399                                   |
| Scopus   | (TITLE-ABS-KEY ( "physical activity" OR "habitual activity" OR "exercise" OR "exercises" OR fitness OR sport OR sedentary OR training OR "physical education" OR "physical activities" OR "habitual activities" OR sports OR sedentariness ) AND TITLE ( stress OR exam OR exams OR test OR tests OR "academic performance" ) AND TITLE-ABS KEY ( achievement OR grade OR grades OR performance OR outcome OR attainment OR assessment OR score ) AND TITLE ( student OR college OR graduate OR university OR tertiary OR students OR colleges OR graduates OR universities OR academic ) AND NOT TITLE ( school OR pupil OR pupils ) )                                                                                                                                                                                                                                                                                                                                                                                                                                 | 1057    | 507                                   |
| SMEI     | ab("physical activity" OR "habitual activity" OR "exercise" OR "exercises" OR fitness OR sport OR sedentary OR training OR "physical education" OR "physical activities" OR "habitual activities" OR sports OR sedentariness) AND ti(stress OR exam OR exams OR test OR tests OR "academic performance") AND ab(achievement OR grade OR grades OR performance OR outcome OR attainment OR assessment OR score) AND ti(student OR college OR graduate OR university OR tertiary OR students OR colleges OR graduates OR universities OR academic) NOT ti(school OR pupil OR pupils)                                                                                                                                                                                                                                                                                                                                                                                                                                                                                      | 204     | 81                                    |
| ERIC     | ("physical activity" OR "habitual activity" OR "exercise" OR "exercises" OR fitness OR sport OR sedentary OR training OR "physical education" OR "physical activities" OR "habitual activities" OR sports OR sedentariness) AND +title:(stress OR exam OR exams OR test OR tests OR "academic performance") AND (achievement OR grade OR grades OR performance OR outcome OR attainment OR assessment OR score) AND +title:(student OR college OR graduate OR university OR tertiary OR students OR colleges OR graduates OR universities OR academic) -school -pupil -pupils                                                                                                                                                                                                                                                                                                                                                                                                                                                                                           | 208     | 185                                   |

**Web of  
Science**

TOPIC: ("physical activity" OR "habitual activity" OR "exercise"  
OR "exercises" OR fitness OR sport OR sedentary OR training  
OR "physical education" OR "physical activities" OR "habitual  
activities" OR sports OR sedentariness) AND TITLE: (stress OR  
exam OR exams OR test OR tests OR "academic performance")  
AND TOPIC: (achievement OR grade OR grades OR  
performance OR outcome OR attainment OR assessment OR  
score) AND TITLE: (student OR college OR graduate OR  
university OR tertiary OR students OR colleges OR graduates OR  
universities OR academic) NOT TITLE: (school OR pupil OR  
pupils)

721

580

**Total:**

**1752**
